# Supplementary material for: Pharmacogenetic Tests in Reducing Accesses to Emergency Services and Days of Hospitalization in Bipolar Disorder: A 2-Year Mirror Analysis
Source: MDPI journal article supplement (doi:10.3390/jpm9020022), 2019-04-30
Supplement: s1 [file s1]

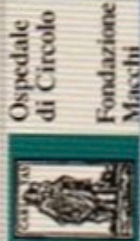

# Portale di Reparto Operatore: 505085 - Reparto: 400 PSICHIATRIA - Paziente: (DA SELEZIONARE)

[Elenco Pazienti](#)
[Pazienti in anagrafica](#)
[Referenziazione](#)
[Ricoverti](#)
[Order Entry](#)

[Inserimento Prenotazione](#)
[Modifica prenotazione](#)

[Identificazione Paziente](#)
[Dati generali](#)
[Dati specifici](#)

## Parametri di ricerca del paziente

Tessera sanitaria:   
 Codice fiscale:   
 Cognome:  ☐ \*  
 Nome:  ☐ \*  
 Data di nascita:     
 Sesso:

## Dettaglio nominativo

Codice AC:   
 Codice anagrafica:   
 Tessera sanitaria:   
 Nome:   
 Cognome:   
 Data di nascita:     
 Nazionalità:   
 Cittadinanza:   
 Provincia nascita:   
 Comune:   
 Codice fiscale:   
 Stato civile:   
 Titolo di studio:   
 Professione:

Comune:   
 Telefono:   
 Medico di base:   
 Regione ASL:   
 ASL di appartenenza:   
 Codice ASL Assistenza:   
 Codice STP:   
 Data inserimento STP:   
 Data scadenza STP:   
 Provenienza dati:   
 Origine dati:   
 Validato MEF:   
 Stato SISS:

## Nominativi trovati

SA Cognome Nome Nascita
