# Supplementary material for: Pharmacogenetic Tests in Reducing Accesses to Emergency Services and Days of Hospitalization in Bipolar Disorder: A 2-Year Mirror Analysis
Source: MDPI journal article supplement (doi:10.3390/jpm9020022), 2019-04-30
Supplement: s1 [file s1]

**Table S1.** List of genes and polymorphisms analyzed

| <b>Gene symbol</b> | <b>Gene Name</b>                                    | <b>Polymorphisms</b>                                                                                                             |
|--------------------|-----------------------------------------------------|----------------------------------------------------------------------------------------------------------------------------------|
| ABCB1              | ATP binding cassette subfamily B member 1           | rs2235048, rs11983225                                                                                                            |
| AKT1               | V-akt murine thymoma viral oncogene homolog 1       | rs1130214                                                                                                                        |
| BDNF               | Brain-derived neurotrophic factor                   | rs6265                                                                                                                           |
| CACNG2             | Calcium channel, voltage-dependent, gamma subunit 2 | rs2284017                                                                                                                        |
| CES1               | Carboxylesterase 1                                  | rs71647871                                                                                                                       |
| COMT               | Catechol-O-methyltransferase                        | rs4680                                                                                                                           |
| CRHR1              | Corticotropin releasing hormone receptor 1          | rs4792888                                                                                                                        |
| CYP1A2             | Cytochrome P450 family 1 subfamily A member 2       | *1, *1F                                                                                                                          |
| CYP2B6             | Cytochrome P450 family 2 subfamily B member 6       | *1, *6                                                                                                                           |
| CYP2C19            | Cytochrome P450 family 2 subfamily C member 19      | *1, *2, *3, *5, *7, *8, *17, *27                                                                                                 |
| CYP2C9             | Cytochrome P450 family 2 subfamily C member 9       | *1, *2, *3, *6, *8, *27                                                                                                          |
| CYP2D6             | Cytochrome P450 family 2 subfamily D member 6       | *1, *2, *2A, *3, *4, *5, *6, *7, *8, *9, *10, *11, *12, *14, *15, *17, *19, *20, *29, *35, *30, *40, *41, *69, *1xN, *2xN, *35x2 |
| CYP3A4             | Cytochrome P450 family 3 subfamily A member 4       | *1, *22                                                                                                                          |
| DDIT4              | DNA damage inducible transcript 4                   | rs1053639                                                                                                                        |
| DRD3               | Dopamine receptor D3                                | rs963468                                                                                                                         |
| EPHX1              | Epoxide hydrolase 1, microsomal (xenobiotic)        | rs1051740                                                                                                                        |
| FCHSD1             | FCH and double SH3 domains 1                        | rs456998                                                                                                                         |
| GRIK2              | Glutamate receptor, ionotropic, kainate 2           | rs2518224                                                                                                                        |
| GRIK4              | Glutamate receptor, ionotropic, kainate 4           | rs1954787                                                                                                                        |
| HLA-A              | Major histocompatibility complex, class I, A        | rs1061235                                                                                                                        |
| HTR1A              | 5-HTT (serotonin) receptor 1A, G protein-coupled    | rs10042486                                                                                                                       |
| HTR2A              | 5-HTT (serotonin) receptor 2A, G protein-coupled    | rs6311, rs6314, rs9316233                                                                                                        |
| HTR2C              | 5-HTT (serotonin) receptor 2C, G protein-coupled    | rs1414334                                                                                                                        |
| LPHN3              | Latrophilin 3                                       | rs6551665                                                                                                                        |
| NEFM               | Neurofilament, medium polypeptide                   | rs1379357, rs1457266                                                                                                             |
| OPRM1              | Opioid receptor, mu 1                               | rs1799971                                                                                                                        |
| RG54               | Regulator of G-protein signaling 4                  | rs2661319                                                                                                                        |

| Gene symbol    | Gene Name                                                        | Polymorphisms |
|----------------|------------------------------------------------------------------|---------------|
| <i>RPTOR</i>   | Regulatory associated protein of MTOR, complex 1                 | rs7211818     |
| <i>SLC6A4</i>  | Solute carrier family 6 (neurotransmitter transporter), member 4 | 5-HTTLPR      |
| <i>UGT2B15</i> | UDP glucuronosyltransferase 2 family, polypeptide B15            | rs1902023     |
